# Supplementary material for: Aptamer-based fluorometric determination of chloramphenicol by controlling the activity of hemin as a peroxidase mimetic
Source: Royal Society of Chemistry journal article supplement (doi:10.1039/d0ay00389a), 2020-01-01
Supplement: d0ay00389a1.pdf [file d0ay00389a1.pdf]

# Supporting Information

## **Aptamer-based fluorometric determination of chloramphenicol by controlling the activity of hemin as peroxidase mimetic**

Ling-Chen Wang <sup>1</sup>, Cheng-Yi Hong <sup>1†</sup>, Zheng-Zhong Lin<sup>1,2</sup>, Xiao-Mei Chen <sup>1</sup>, Zhi-Yong Huang  
<sup>1,2†</sup>

(1. College of Food and Biological Engineering, Jimei University, Xiamen, 361021, China;

2. Fujian Provincial Key Laboratory of Food Microbiology and Enzyme Engineering, Xiamen,

Fujian Province 361021, China)

---

Corresponding author. Tel.: +86-592-6181912; fax: +86-592-6180470. *E-mail address*: [cyhong@jmu.edu.cn](mailto:cyhong@jmu.edu.cn)

Corresponding author. Tel.: +86-592-6181912; fax: +86-592-6180470. *E-mail address*: [zhyhuang@jmu.edu.cn](mailto:zhyhuang@jmu.edu.cn)

## Supporting Tables

Table S1 Detailed information of DNA sequences

| Name    | Detailed sequence information (from 5' to 3')         |
|---------|-------------------------------------------------------|
| Probe 1 | 5'-ACTTCAGTGAGTTGTCCCACGGTCGGCGAGTCGGTGGTAG-hemin-3'; |
| Probe 2 | 5'-hemin-CTACCACCGACTCGC-3'                           |

The underlined bases of Probe 1 are complementary sequences to Probe 2.

## Supporting Figures

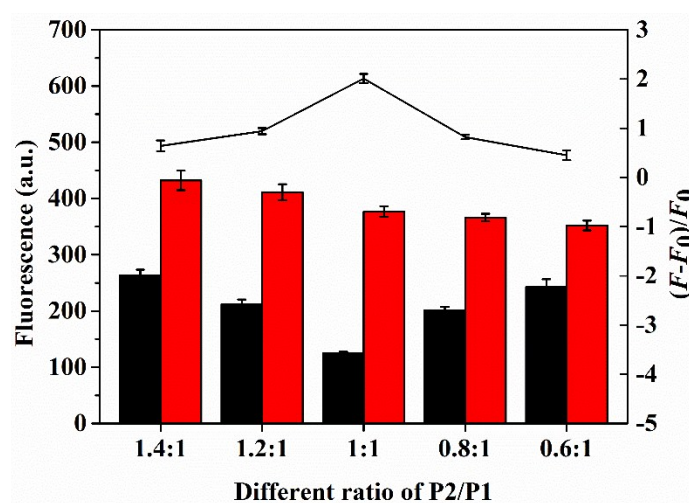

**Figure S1.** Effects of different ratio of P2/P1 for CAP (100 ng mL<sup>-1</sup>) detection. Black bars and red bars represent the fluorescence signal of system in the absence and in the presence of CAP, respectively.

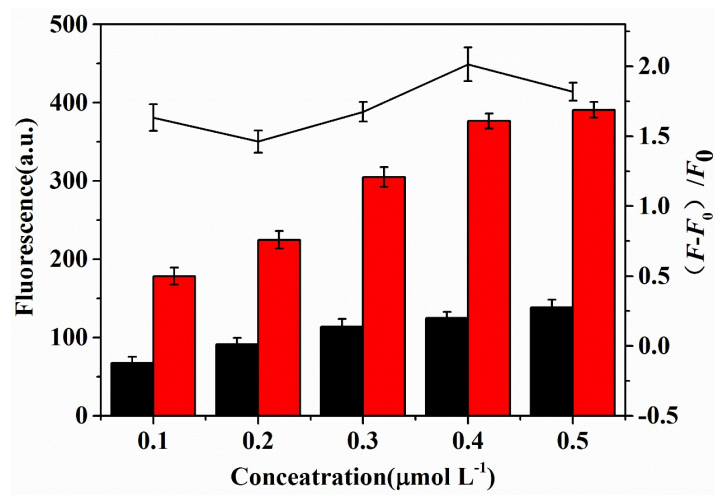

**Figure S2.** Effects of the concentrations of double strand probe for detection of  $100 \text{ ng mL}^{-1}$  target CAP. Different concentrations of double strand probe were used (0.1, 0.2, 0.3, 0.4 and  $0.5 \mu\text{M}$ ).

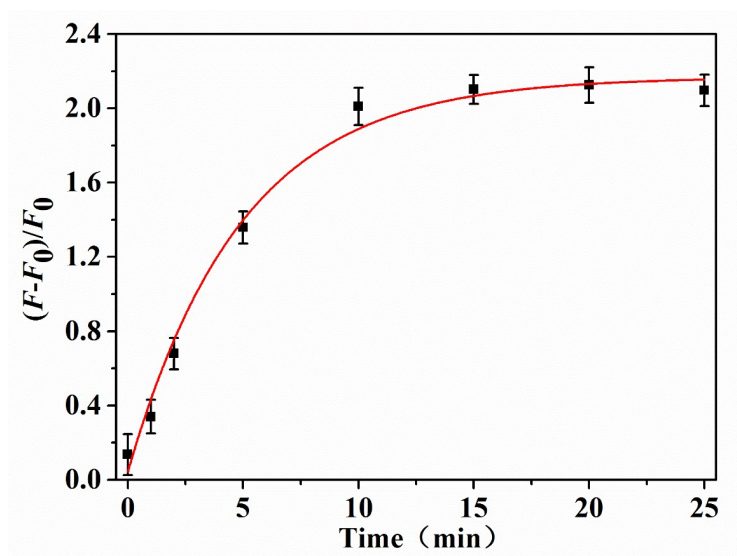

**Figure S3.** The time-dependent fluorescence changes of double strand probe for detection of  $100 \text{ ng mL}^{-1}$  target CAP.

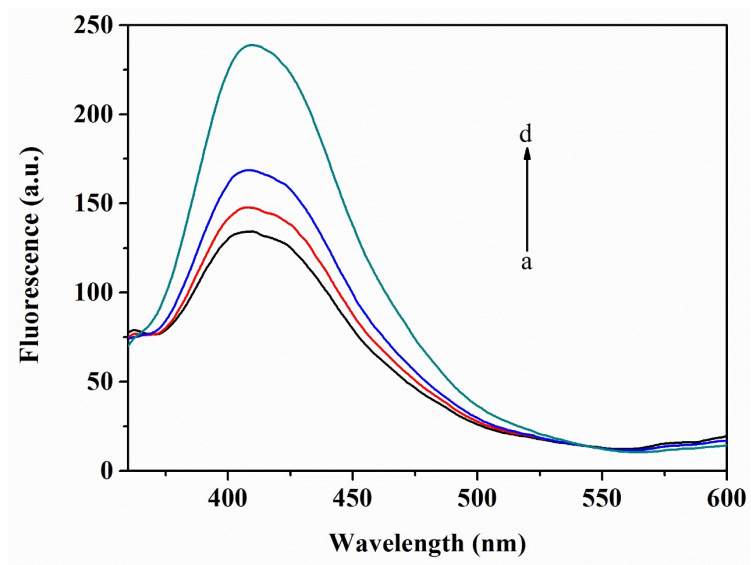

**Figure S4.** Fluorescence emission spectra of the assay for target CAP (0, 0.1, 1, 5 ng mL<sup>-1</sup>) in diluted honey samples.
